# Supplementary material for: Hypothermia Alleviates Reductive Stress, a Root Cause of Ischemia Reperfusion Injury
Source: MDPI journal article supplement (doi:10.3390/ijms231710108), 2022-09-03
Supplement: s1 [file s1]

## *Supplementary Material*

# Hypothermia alleviates reductive stress, a root cause of ischemia reperfusion injury

Kattri-Liis Eskla<sup>a, b, 1, \*</sup>, Hans Vellama<sup>a, b, 1</sup>, Liisi Tarve<sup>a, b</sup>, Hillar Eichelmann<sup>c, d</sup>, Toomas Jagomäe<sup>a, b</sup>, Rando Porosk<sup>e</sup>, Vello Oja<sup>d, 2</sup>, Heikko Rämme<sup>d</sup>, Nadežda Peet<sup>e</sup>, Agu Laisk<sup>d</sup>, Vallo Volke<sup>e</sup>, Eero Vasar<sup>a, b</sup>, Hendrik Luuk<sup>a, b</sup>

<sup>a</sup> Institute of Biomedicine and Translational Medicine, Department of Physiology, University of Tartu, Tartu, Estonia

<sup>b</sup> Center of Excellence for Genomics and Translational Medicine, University of Tartu, Tartu, Estonia

<sup>c</sup> Institute of Biomedicine and Translational Medicine, Department of Pathophysiology, University of Tartu, Tartu, Estonia

<sup>d</sup> Institute of Technology, University of Tartu, Tartu, Estonia

<sup>e</sup> Institute of Biomedicine and Translational Medicine, Department of Biochemistry, University of Tartu, Tartu, Estonia

<sup>1</sup> These authors contributed equally

<sup>2</sup> Deceased

\* Corresponding author

**Table S1.** Primers used for qPCR analysis

| Gene name | Forward primer 5' 3'          | Reverse primer 5' 3'           |
|-----------|-------------------------------|--------------------------------|
| BNIP3     | GACGCACAGCATGAGTCTGGAC        | CTTGACCAATCCCATATCCAATCTGAG    |
| CIRBP     | GCCATGGCATCAGATGAAGGC         | CTGTCTTTCACAACCACCACTTC        |
| CYT-B     | TAGCAATAATCCCCATCCTCCATATATCC | ACTTGTCCAATGATGGTAAAAGGGTAGC   |
| H4C       | GCTCCGGGATAACATCCAGGGCATT     | CCTGACGTTTTAGGGCATATACTACATC   |
| HPRT1     | GACTTTGCTTTCCTTGGTCAGG        | AGTCTGGCTTATATCCAACACTTCG      |
| LDHA      | GCTGGGAGTTCACCCATTAAGCTG      | CAATAGCCAGGATGTGTAGCCTTTGAG    |
| PDK1      | ATCAGTGAATGCTTGTGAAAAGACCTC   | CTGAAGACTCTGGATATACCAGCTTTGTA  |
| PPARG     | AGCCTGCATCTCCACCTTATTATTCTGAG | GCTTCAATCTGATTGTTCTCCGGAAGAAAC |
| RBM3      | CTCTGAAGAAGGAAAGCTCTTCG       | GTCCTTGACAACGACCACCTC          |

**Table S2.** O<sub>2</sub> concentrations calculations

| Experiment environment (cm <sup>2</sup> ) | O <sub>2</sub> partial pressure in gas (mmHg) | O <sub>2</sub> concentration in medium (mM) | Diffusion coefficient - D (cm <sup>2</sup> /s) | ΔC (mM) | Maximum medium layer thickness Δx (mm) | Actual medium layer (mm) |
|-------------------------------------------|-----------------------------------------------|---------------------------------------------|------------------------------------------------|---------|----------------------------------------|--------------------------|
| Hypoxic 6-well<br>S = 9.62                | 7.6<br>(1% O <sub>2</sub> )                   | 0.0099                                      | $2.69 \times 10^{-5}$                          | 0.0049  | ~0.13                                  | ~2.1                     |
| Normoxic Petri dish<br>S = 58.1           | 141.4<br>(18.6% O <sub>2</sub> )              | 0.181                                       | $2.69 \times 10^{-5}$                          | 0.176   | ~4.51                                  | ~1.7                     |
| Normoxic Glass plate<br>S = 54.11         | 13.3<br>(1.75% O <sub>2</sub> )               | 0.0173                                      | $2.84 \times 10^{-5}$                          | 0.0123  | ~0.33                                  | ~0.1                     |

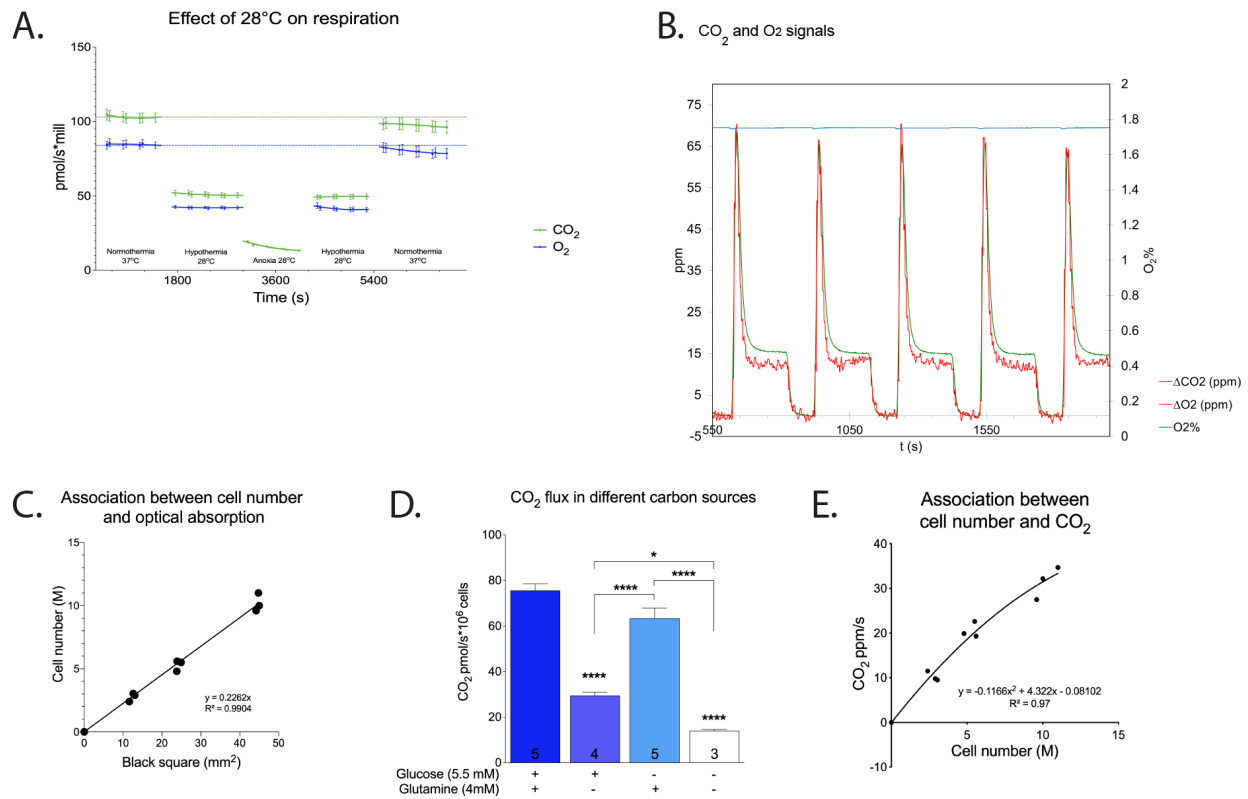

**Figure S1.** Example of experiment set-up showing effect of 28°C on respiration as measured by the cellular gas flux measurement device (A). CO<sub>2</sub> and O<sub>2</sub> signals as measured by the cellular gas flux measurement device (B). Measurements were recorded by switching between the reference chamber (100 sec) and the cell chamber (200 sec). Association between cell number and optical absorption (C). CO<sub>2</sub> flux in different carbon sources (D). Association between CO<sub>2</sub> flux and cell number (E). HKC-8 cells were used in all experiments. The asterisks refer to a statistically significant difference with respect to the complete medium unless indicated otherwise. Number on the bar indicates sample size. Statistical analysis was performed with One-way ANOVA with post-hoc Tukey HSD Test. \*,  $p < 0.05$ ; \*\*\*\*,  $p < 0.0001$ .

## A. Liquid phase O<sub>2</sub> flux

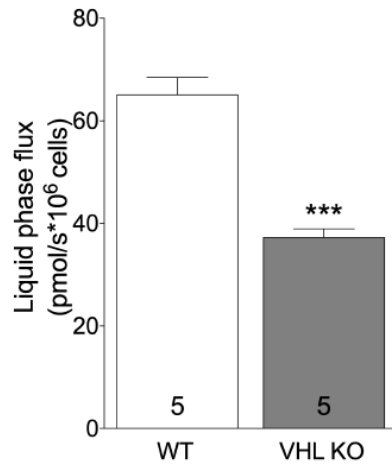

## B. Gas phase O<sub>2</sub> flux

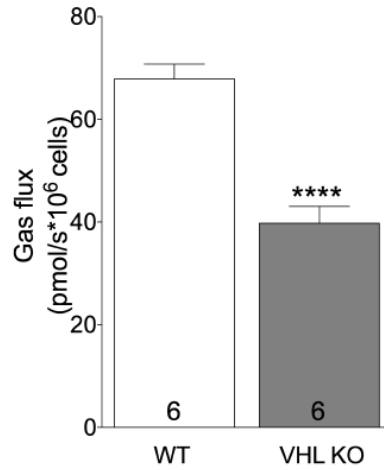

**Figure S2.** Genotype effect on O<sub>2</sub> flux as measured by Oroboros oxygraph in liquid phase (A) and O<sub>2</sub> flux as measured by cellular gas flux measurement device (B). The asterisks refer to a statistically significant difference with respect to the WT cells unless indicated otherwise. Number on the bar indicates sample size. Values are expressed as mean  $\pm$  SEM. Statistical analysis was performed with unpaired t-test with Welch's correction. \*\*\*  $p < 0.001$ ; \*\*\*\*,  $p < 0.0001$

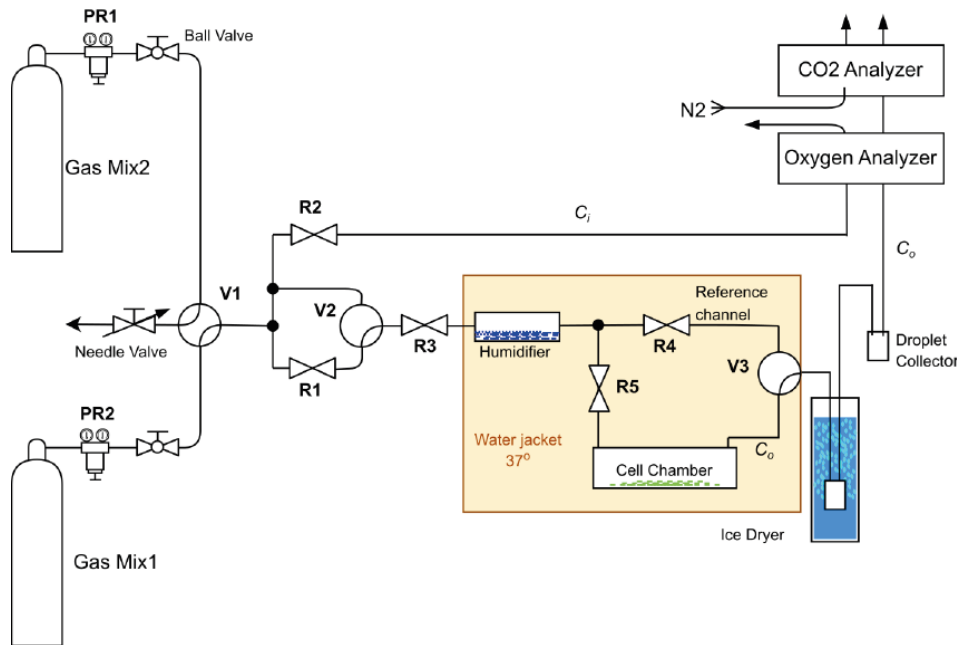

**Figure S3.** Diagram of the off-gas measurement device. Respiration rate was calculated from the difference between outlet gas concentration ( $C_o$ ) and inlet gas concentration ( $C_i$ ), from  $R = v(C_o - C_i)$  where  $v$  is the gas flow rate, mole\*s<sup>-1</sup>, and  $R$  is respiration rate expressed in mole\*s<sup>-1</sup> per whole object in the chamber. PR1, PR2 - pressure reducing valves; V1, V2, V3 - automated valves; R1, R2, R3, R4, R5 - resistances capillaries.
